# Supplementary material for: Steric guided anomalous thermal expansion in a dimorphic organic system
Source: Royal Society of Chemistry journal article supplement (doi:10.1039/c3ce41869c), 2014-01-01
Supplement: c3ce41869c2.pdf [file c3ce41869c2.pdf]

## Supporting Information

### Steric Guided Anomalous Thermal Expansion in a Dimorphic Organic System

Suman Bhattacharya, and Binoy K. Saha\*

Department of Chemistry, Pondicherry University, Pondicherry, India

#### Contents

**Experimental:** Crystallization and X-Ray crystallography

**Figure S1** : ORTEP plots for the data at 50 % probability

**Figure S2** : Thermal expansivity indicatrix for the (a) **MBDA Form I** (triclinic) (b) **MBDA Form II** (monoclinic) systems.

**Figure S3** : Change in  $\sqrt{U_{eq}}$  values with temperature for the different carbon atoms of **MBDA** in Form I.

**Table S1** : Hydrogen bond interaction for **MBDA (Triclinic) Form I**.

**Table S2** : Asphericity Index calculations for the systems.

**Table S3** : Anisotropy in volumetric thermal expansion for some reported sets of polymorphs.

**Table S4** : Crystallographic parameters for the systems

#### Reference

## Experimental Details:

**Crystallization:** Both the polymorphic forms were formed concomitantly when a 2:3 stoichiometric mixture of the benzene-1,3,5-tricarboxylic acid (**BTA**) and 4,4'-Methylenebis(2,6-dimethylaniline) (**MBDA**) were crystallized from ethanol. However, the major product of the experiment was a 1:1:1 cocrystal solvate of **BTA**, **MBDA** and ethanol.

**X-Ray crystallography:** X-ray crystal data were collected on Xcalibur Eos Oxford Diffraction Ltd. with Mo- $K_{\alpha}$  radiation ( $\lambda = 0.71073 \text{ \AA}$ ). Empirical absorption correction using spherical harmonics, implemented in SCALE3 ABSPACK scaling algorithm were applied.<sup>S1</sup> Structure solution and refinement were performed with SHELXS-97<sup>S2</sup> and XL<sup>S3</sup> respectively. Diffraction quality single crystal for both forms I and II polymorphs of **MBDA**, were chosen for the experiments. The crystals were mounted and six data sets were collected for each by cooling the crystals gradually from 298 K to 148 K at 30 K interval. The Form II triclinic crystal could not be cooled below 135 K without avoiding disintegration. The temperature control was performed by cryojet controlling a liquid nitrogen flow. In both the forms, the carbon bonded hydrogen atoms were placed in calculated positions where as the amine hydrogen atoms were isotropically refined. CCDC 948909 – 948920.

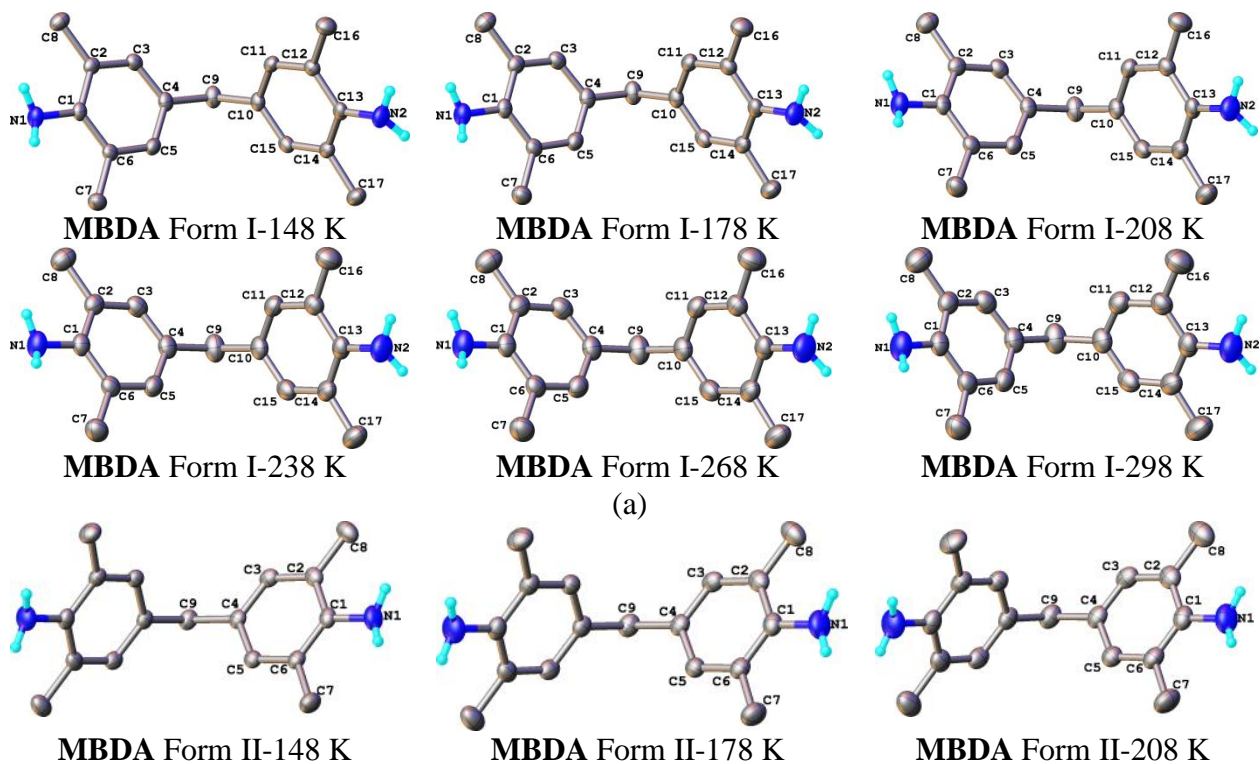

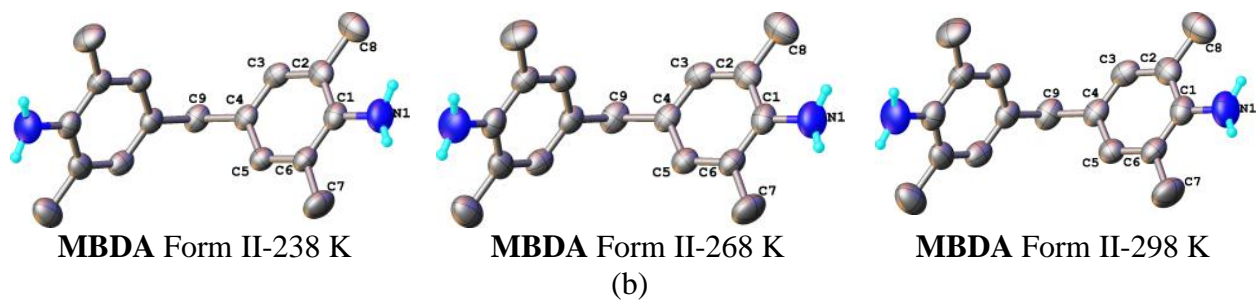

**Figure S1:** ORTEP plots for the data at 50 % probability.

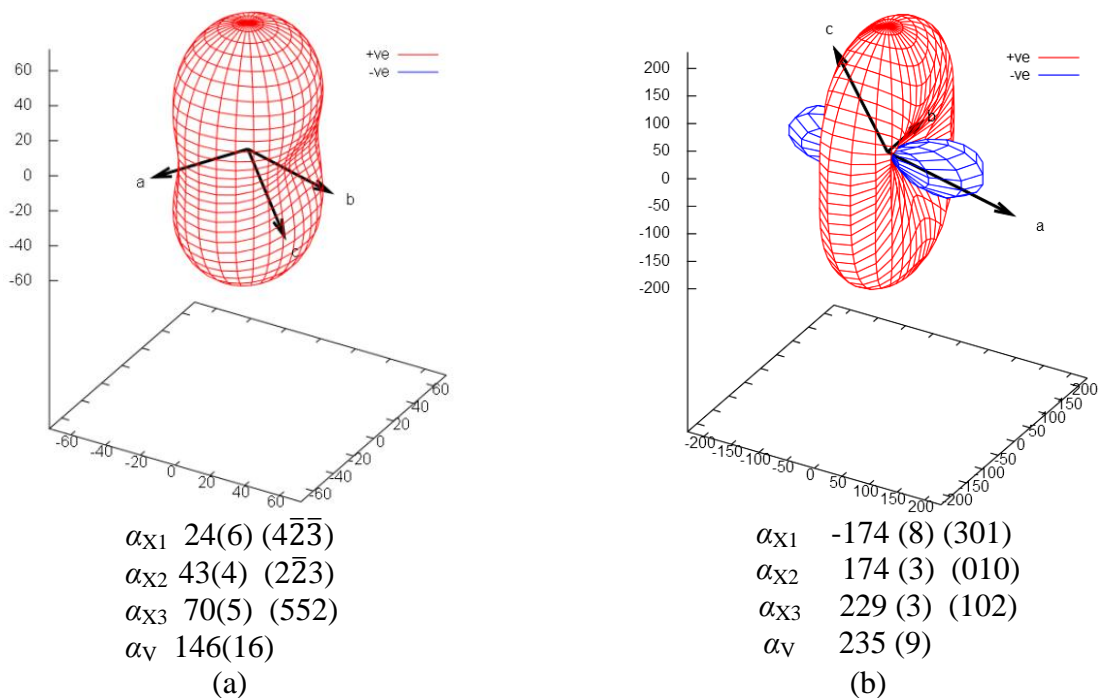

**Figure S2:** Thermal expansivity indicatrix for the (a) **MBDA** Form I (triclinic) (b) **MBDA** Form II (monoclinic) systems which is a hypothetical surface obtained by joining the tip of the expansion vectors of the system along every direction. The indicatrix has a unit of  $\text{MK}^{-1}\text{S}^4$ .

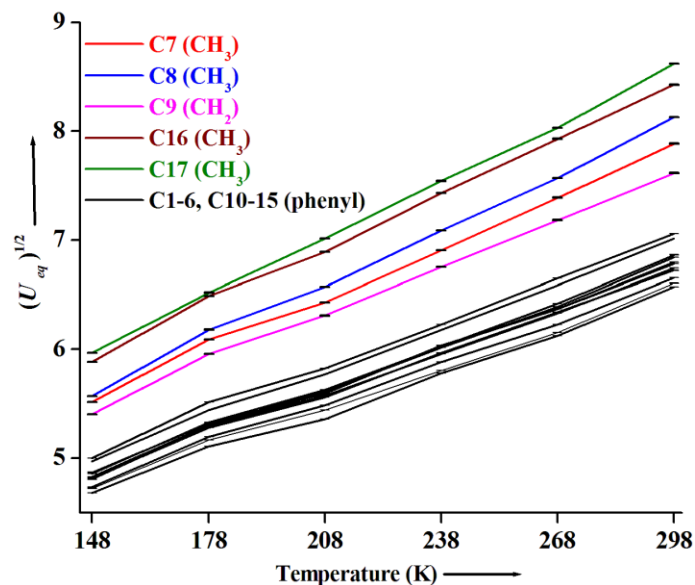

**Figure S3:** The change in  $\sqrt{U_{eq}}$  values with temperature for the different carbon atoms of **MBDA** in Form I. C1-6 and C10-15 (phenyl) represents the carbon atoms forming the aromatic ring of **MBDA**

|          | 148        | 178       | 208       | 238      | 268      | 298      |
|----------|------------|-----------|-----------|----------|----------|----------|
| N–H      | 0.89(2)    | 0.90(2)   | 0.89(2)   | 0.93(2)  | 0.92(2)  | 0.95(2)  |
| <i>d</i> | 2.405(19)  | 2.398(19) | 2.418(19) | 2.39(2)  | 2.41(2)  | 2.40(2)  |
| <i>D</i> | 3.2265(18) | 3.233(2)  | 3.238(2)  | 3.242(2) | 3.252(2) | 3.254(3) |
| $\theta$ | 154(2)     | 155(2)    | 152(2)    | 153(2)   | 152(2)   | 150(2)   |

| $A = \frac{2}{3} \left( 1 - \frac{3\beta}{\alpha_v^2} \right)^{1/2}$                                                                                                                                                                                                                                           | <i>A</i> =Aspherism Index<br>$\beta = \alpha_1\alpha_2 + \alpha_2\alpha_3 + \alpha_1\alpha_3$<br>$\alpha_i$ =Coefficient of Expansion ( $\text{MK}^{-1}$ )                                                                                                                                                                        |
|----------------------------------------------------------------------------------------------------------------------------------------------------------------------------------------------------------------------------------------------------------------------------------------------------------------|-----------------------------------------------------------------------------------------------------------------------------------------------------------------------------------------------------------------------------------------------------------------------------------------------------------------------------------|
| <b>MBDA Triclinic Form I</b><br>$\beta = \alpha_1\alpha_2 + \alpha_2\alpha_3 + \alpha_1\alpha_3$<br>$= (24 \times 43 + 43 \times 70 + 71 \times 24) = 5722 \text{ MK}^{-2}$<br><br>$\alpha_v^2 = 21316 \text{ MK}^{-2}$<br>$A = \frac{2}{3} \left( 1 - \frac{3 \times 5722}{21316} \right)^{1/2}$<br>$= 0.294$ | <b>MBDA Monoclinic Form II</b><br>$\beta = \alpha_1\alpha_2 + \alpha_2\alpha_3 + \alpha_1\alpha_3$<br>$= (-174 \times 174 + 174 \times 229 + 229 \times (-174))$<br>$= -30276 \text{ MK}^{-2}$<br>$\alpha_v^2 = 54756 \text{ MK}^{-2}$<br>$A = \frac{2}{3} \left( 1 - \frac{3 \times (-30276)}{54756} \right)^{1/2}$<br>$= 1.087$ |

| Polymorphic modification                                                                                                                                               |                                                                                                                                                                    | Temp. Range (K) | Ratio of volumetric coefficients |
|------------------------------------------------------------------------------------------------------------------------------------------------------------------------|--------------------------------------------------------------------------------------------------------------------------------------------------------------------|-----------------|----------------------------------|
| $\alpha$ - <i>p</i> -Nitrophenol                                                                                                                                       | $\beta$ - <i>p</i> -Nitrophenol <sup>S5a</sup>                                                                                                                     |                 |                                  |
| $\alpha_{X1} = -1 \text{ MK}^{-1}$<br>$\alpha_{X2} = 47 \text{ MK}^{-1}$<br>$\alpha_{X3} = 109 \text{ MK}^{-1}$<br>$\alpha_v = 156 \text{ MK}^{-1}$                    | $\alpha_{X1} = 25 \text{ MK}^{-1}$<br>$\alpha_{X2} = 28 \text{ MK}^{-1}$<br>$\alpha_{X3} = 147 \text{ MK}^{-1}$<br>$\alpha_v = 203 \text{ MK}^{-1}$                | 120 to 198      | 1.30                             |
| $\gamma$ -hexanitrohexaazaisowurtzitane                                                                                                                                | $\varepsilon$ -hexanitrohexaazaisowurtzitane <sup>S5b</sup>                                                                                                        |                 |                                  |
| $\alpha_{X1} = -6(1) \text{ MK}^{-1}$<br>$\alpha_{X2} = 22(1) \text{ MK}^{-1}$<br>$\alpha_{X3} = 84(4) \text{ MK}^{-1}$<br>$\alpha_v = 103(7) \text{ MK}^{-1}$         | $\alpha_{X1} = 20(2) \text{ MK}^{-1}$<br>$\alpha_{X2} = 46(2) \text{ MK}^{-1}$<br>$\alpha_{X3} = 54(3) \text{ MK}^{-1}$<br>$\alpha_v = 123(3) \text{ MK}^{-1}$     | 100 to 298      | 1.19                             |
| CBTA•BPE Form I                                                                                                                                                        | CBTA•BPE Form I <sup>S5c</sup>                                                                                                                                     |                 |                                  |
| $\alpha_{X1} = 4(5) \text{ MK}^{-1}$<br>$\alpha_{X2} = 25(4) \text{ MK}^{-1}$<br>$\alpha_{X3} = 147(8) \text{ MK}^{-1}$<br>$\alpha_v = 183(14) \text{ MK}^{-1}$        | $\alpha_{X1} = -4(5) \text{ MK}^{-1}$<br>$\alpha_{X2} = 18(5) \text{ MK}^{-1}$<br>$\alpha_{X3} = 136(5) \text{ MK}^{-1}$<br>$\alpha_v = 158(15) \text{ MK}^{-1}$   | 120 to 298      | 1.16                             |
| ( <i>S,S</i> )-3,5-octadiyn-2,7-diol(HT) <sup>S5d</sup>                                                                                                                | ( <i>S,S</i> )-3,5-octadiyn-2,7-diol(LT) <sup>S5e</sup>                                                                                                            |                 |                                  |
| $\alpha_{X1} = -205(24) \text{ MK}^{-1}$<br>$\alpha_{X2} = -77(16) \text{ MK}^{-1}$<br>$\alpha_{X3} = 562(49) \text{ MK}^{-1}$<br>$\alpha_v = 271(10) \text{ MK}^{-1}$ | $\alpha_{X1} = -15(8) \text{ MK}^{-1}$<br>$\alpha_{X2} = 22(1) \text{ MK}^{-1}$<br>$\alpha_{X3} = 191(22) \text{ MK}^{-1}$<br>$\alpha_v = 202(13) \text{ MK}^{-1}$ | 225 to 315      | 1.34                             |
| MBDA Form I                                                                                                                                                            | MBDA Form II*                                                                                                                                                      |                 |                                  |
| $\alpha_{X1} = 24(6)$<br>$\alpha_{X2} = 43(4)$<br>$\alpha_{X3} = 70(5)$<br>$\alpha_v = 146(16)$                                                                        | $\alpha_{X1} = -174(8)$<br>$\alpha_{X2} = 174(3)$<br>$\alpha_{X3} = 229(3)$<br>$\alpha_v = 234(9)$                                                                 | 148 to 298      | 1.60                             |
| *Work discussed in this report.                                                                                                                                        |                                                                                                                                                                    |                 |                                  |

| <b>MBDA Form I, Triclinic</b> |                                                |                                                |                                                |                                                |                                                |                                                |
|-------------------------------|------------------------------------------------|------------------------------------------------|------------------------------------------------|------------------------------------------------|------------------------------------------------|------------------------------------------------|
| Temperature (K)               | 148                                            | 178                                            | 208                                            | 238                                            | 268                                            | 298                                            |
| Formula                       | C <sub>17</sub> H <sub>22</sub> N <sub>2</sub> |
| Mr                            | 254.37                                         | 254.37                                         | 254.37                                         | 254.37                                         | 254.37                                         | 254.37                                         |
| Crystal system                | triclinic                                      | triclinic                                      | triclinic                                      | triclinic                                      | triclinic                                      | triclinic                                      |
| Space group                   | $P\bar{1}$                                     | $P\bar{1}$                                     | $P\bar{1}$                                     | $P\bar{1}$                                     | $P\bar{1}$                                     | $P\bar{1}$                                     |
| <i>a</i> (Å)                  | 8.2122(7)                                      | 8.2145(7)                                      | 8.2268(7)                                      | 8.2384(8)                                      | 8.2565(8)                                      | 8.2504(9)                                      |
| <i>b</i> (Å)                  | 9.0548(5)                                      | 9.0601(6)                                      | 9.0703(6)                                      | 9.0950(6)                                      | 9.1147(6)                                      | 9.1159(7)                                      |
| <i>c</i> (Å)                  | 11.4228(7)                                     | 11.4225(8)                                     | 11.4426(8)                                     | 11.4600(8)                                     | 11.4695(8)                                     | 11.4622(9)                                     |
| $\alpha$ (°)                  | 93.672(5)                                      | 93.690(6)                                      | 93.691(5)                                      | 93.700(6)                                      | 93.722(5)                                      | 93.800(7)                                      |

|                                         |                       |                       |                       |                      |                       |                       |
|-----------------------------------------|-----------------------|-----------------------|-----------------------|----------------------|-----------------------|-----------------------|
| $\beta$ (°)                             | 110.255(7)            | 110.215(7)            | 110.218(7)            | 110.161(8)           | 110.153(8)            | 110.087(9)            |
| $\gamma$ (°)                            | 108.406(6)            | 108.361(7)            | 108.335(6)            | 108.267(7)           | 108.221(7)            | 108.151(9)            |
| $V$ (Å <sup>3</sup> )                   | 741.63(9)             | 742.67(10)            | 746.06(9)             | 750.96(10)           | 755.11(10)            | 754.71(12)            |
| Crystal size                            | 0.42 x 0.38 x<br>0.36 | 0.42 x 0.38 x<br>0.36 | 0.42 x 0.38 x<br>0.36 | 0.42 x 0.38x<br>0.36 | 0.42 x 0.38 x<br>0.36 | 0.42 x 0.38 x<br>0.36 |
| $\rho$ (g/cc)                           | 1.139                 | 1.137                 | 1.132                 | 1.125                | 1.119                 | 1.119                 |
| $T$ (K)                                 | 148 (2)               | 178 (2)               | 208 (2)               | 238 (2)              | 268 (2)               | 298 (2)               |
| $Z$                                     | 2                     | 2                     | 2                     | 2                    | 2                     | 2                     |
| $F(000)$                                | 276                   | 276                   | 276                   | 276                  | 276                   | 276                   |
| $\mu$ (mm <sup>-1</sup> )               | 0.067                 | 0.067                 | 0.067                 | 0.066                | 0.066                 | 0.066                 |
| Ref.<br>collected/unique                | 6918/3356             | 7177/3399             | 7125/3372             | 7096/3406            | 6901/3386             | 7173/3453             |
| Parameters                              | 192                   | 192                   | 192                   | 192                  | 192                   | 192                   |
| Final R indices<br>[ $I > 2\sigma(I)$ ] | 0.0435                | 0.0450                | 0.0461                | 0.0483               | 0.0488                | 0.0516                |
| R indices (all<br>data)                 | 0.1123                | 0.1174                | 0.1221                | 0.1282               | 0.1322                | 0.1420                |
| Goodness of fit on<br>$F^2$             | 1.027                 | 1.052                 | 1.032                 | 1.023                | 1.031                 | 1.042                 |

| <b>MBDA Form II, Monoclinic</b> |                                                |                                                |                                                |                                                |                                                |                                                |
|---------------------------------|------------------------------------------------|------------------------------------------------|------------------------------------------------|------------------------------------------------|------------------------------------------------|------------------------------------------------|
| <b>Temperature (K)</b>          | <b>148</b>                                     | <b>178</b>                                     | <b>208</b>                                     | <b>238</b>                                     | <b>268</b>                                     | <b>298</b>                                     |
| Formula                         | C <sub>17</sub> H <sub>22</sub> N <sub>2</sub> |
| $M_r$                           | 254.37                                         | 254.37                                         | 254.37                                         | 254.37                                         | 254.37                                         | 254.37                                         |
| Crystal system                  | monoclinic                                     | monoclinic                                     | monoclinic                                     | monoclinic                                     | monoclinic                                     | monoclinic                                     |
| Space group                     | <i>C2/c</i>                                    | <i>C2/c</i>                                    | <i>C2/c</i>                                    | <i>C2/c</i>                                    | <i>C2/c</i>                                    | <i>C2/c</i>                                    |
| $a$ (Å)                         | 17.9670(12)                                    | 17.9037(14)                                    | 17.8536(16)                                    | 17.7463(14)                                    | 17.6512(18)                                    | 17.5602(17)                                    |
| $b$ (Å)                         | 7.9756(6)                                      | 8.0121(8)                                      | 8.0700(6)                                      | 8.0930(7)                                      | 8.1468(5)                                      | 8.1816(6)                                      |
| $c$ (Å)                         | 14.0251(8)                                     | 14.0696(9)                                     | 14.1329(11)                                    | 14.1825(9)                                     | 14.2338(10)                                    | 14.2820(10)                                    |
| $\alpha$ (°)                    | 90.00                                          | 90.00                                          | 90.00                                          | 90.00                                          | 90.00                                          | 90.00                                          |
| $\beta$ (°)                     | 133.571(4)                                     | 133.440(4)                                     | 133.271(5)                                     | 133.117(4)                                     | 132.931(6)                                     | 132.800(5)                                     |
| $\gamma$ (°)                    | 90.00                                          | 90.00                                          | 90.00                                          | 90.00                                          | 90.00                                          | 90.00                                          |
| $V$ (Å <sup>3</sup> )           | 1456.11(17)                                    | 1465.4(2)                                      | 1482.65(19)                                    | 1486.85(19)                                    | 1498.6(2)                                      | 1505.5(2)                                      |
| Crystal size                    | 0.44 x 0.34 x<br>0.3                           |
| $\rho$ (g/cc)                   | 1.160                                          | 1.153                                          | 1.140                                          | 1.136                                          | 1.127                                          | 1.122                                          |
| $T$ (K)                         | 148 (2)                                        | 178 (2)                                        | 208 (2)                                        | 238 (2)                                        | 268 (2)                                        | 298 (2)                                        |
| $Z$                             | 4                                              | 4                                              | 4                                              | 4                                              | 4                                              | 4                                              |
| $F(000)$                        | 552                                            | 552                                            | 552                                            | 552                                            | 552                                            | 552                                            |

|                                    |           |           |           |           |           |           |
|------------------------------------|-----------|-----------|-----------|-----------|-----------|-----------|
| $\mu(\text{mm}^{-1})$              | 0.068     | 0.068     | 0.067     | 0.067     | 0.066     | 0.066     |
| Ref. collected/unique              | 3828/1675 | 3773/1701 | 3663/1696 | 3700/1712 | 3909/1728 | 3767/1732 |
| Parameters                         | 97        | 97        | 97        | 97        | 97        | 97        |
| Final R indices [I>2 $\sigma$ (I)] | 0.0426    | 0.0497    | 0.0530    | 0.0584    | 0.0544    | 0.0563    |
| R indices (all data)               | 0.1115    | 0.1451    | 0.1393    | 0.1662    | 0.1361    | 0.1663    |
| Goodness of fit on $F^2$           | 1.041     | 1.051     | 1.035     | 1.021     | 1.014     | 1.019     |

### Reference:

S1. CrysAlisPro, Version 1.171.33.66; Oxford Diffraction Ltd.: Abingdon, U.K., 2010.

S2.(a) G. M. Sheldrick, SHELXS-97, Programs for the Solution of Crystal Structures; University of Gottingen: Germany, 1997. (b) G. M. Sheldrick, SHELXL, *Acta Cryst.*, 2008, **A64**, 112 – 122.

S3. O. V. Dolomanov, L. J. Bourhis, R. J. Gildea, J. A. K. Howard and H. Puschmann, *J. Appl. Cryst.*, 2009, **42**, 339 – 341.

S4. M. J. Cliffe and A. L. Goodwin, *J. Appl. Cryst.*, 2012, **45**, 1321 – 1329

S5.(a) N. B. Bolotina, M. J. Hardie, R. L. Speer Jr and A. A. Pinkerton, *J. Appl. Cryst.*, 2004, **37**, 808 – 814. (b) G. Wójcik and I. Mossakowska, *Acta Cryst.*, 2006, **B62**, 143 – 152. (c) S. Bhattacharya and B. K. Saha, *Cryst. Growth Des.*, 2013, **13**, 3299 – 3302. (d) D. Das, T. Jacobs and L. J. Barbour, *Nat. Mater.*, 2010, **9**, 36 – 39. (e) D. Das, T. Jacobs, A. Pietraszko and L. J. Barbour, *Chem. Commun.*, 2011, **47**, 6009 – 6011.
